# Supplementary material
Source: MDPI journal article supplement (https://www.mdpi.com/2071-1050/10/12/4339)
Supplement: s1 [file s1]

**Supplementary material 2.** Complete list of studies included in our literature review. Studies included in our second database are previously marked with “\*”.

1. \*Almagro, M.; de Vente, J.; Boix-Fayos, C.; García-Franco, N.; Meglares de Aguilar, J.; González, D.; Solé-Benet, A.; Martínez-Mena, M. Sustainable land management practices as providers of several ecosystem services under rainfed Mediterranean agroecosystems. *Mitig. Adapt. Strat. Gl.* **2013**, *21*, 1029-1043, 10.1007/s11027-013-9535-2; WOS:000387616700004
2. \*Amano, T.; Kusumoto, Y.; Okamura, H.; Baba, Y.G.; Hamasaki, K.; Tanaka, K.; Yamamoto, S. A macro-scale perspective on within-farm management: how climate and topography alter the effect of farming practices. *Ecol. Lett.* **2011**, *14*, 1263-1272, 10.1111/j.1461-0248.2011.01699.x; WOS:000297147500010
3. \*Andersson, G.K.S.; Rundlöf, M.; Smith, H.G. Organic Farming Improves Pollination Success in Strawberries. *PlosOne*. **2012**, *7*, e31599, 10.1371/journal.pone.0031599; WOS:000302741300080
4. \*Andersson, G.K.S.; Birkhofer, K.; Rundlöf, M.; Smith, H.G. Landscape heterogeneity and farming practice alter the species composition and taxonomic breadth of pollinator communities. *Basic Appl. Ecol.* **2013**, *14*, 540-546, 10.1016/j.baae.2013.08.003; WOS:000325758400002
5. \*Andersson, G.K.S.; Ekroos, J.; Stjernman, M.; Rundlöf, M.; Smith, H.G. Effects of farming intensity, crop rotation and landscapes heterogeneity on field bean pollination. *Agr. Ecosyst. Environ.* **2014**, *184*, 145-148, 10.1016/j.agee.2013.12.002; WOS:000334002700015
6. Atwell, R.C.; Schulte, L.A.; Westphal, L.M. How to build multifunctional agricultural landscapes in the U.S. Corn Belt: Add perennials and partnerships. *Land Use Policy*. **2010**, *27*, 1082-1090, 10.1016/j.landusepol.2010.02.004; WOS:000278897400009
7. Austin, Z.; Penic, M.; Raffaelli, D.G.; White, P.C.L. Stakeholder perceptions of the effectiveness and efficiency of agri-environment schemes in enhancing pollinators on farmland. *Land Use Policy*. **2015**, *47*, 156-162, 10.1016/j.landusepol.2015.04.003; WOS:000358807000014
8. \*Balzan, M.V.; Bocci, G.; Moonen, A.C. Augmenting flower trait diversity in wildflower strips to optimise the conservation of arthropod functional groups for multiple agroecosystem services. *J. Insect. Conserv.* **2014**, *18*, 713-728, 10.1007/s10841-014-9680-2; WOS:000340450000020
9. \*Bernués, A.; Rodríguez-Ortega, T.; Alfnes, F.; Clemetsen, M.; Eik, L.O. Quantifying the multifunctionality of fjord and mountain agriculture by means of sociocultural and economic valuation of ecosystem services. *Land Use Policy*. **2015**, *48*, 170-178, 10.1016/j.landusepol.2015.05.022; WOS:000362152800014
10. \*Bernués, A.; Tello-García, E.; Rodríguez-Ortega, T.; Ripoll-Bosch, R.; Casasús, I. Agricultural practices, ecosystem services and sustainability in High Nature Value farmland: unraveling the perceptions of farmers and nonfarmers. *Land Use Policy*. **2016**, *59*, 130-142, 10.1016/j.landusepol.2016.08.033; WOS:000387519600012
11. \*Bianchi, F.J.J.A.; Ives, A.R.; Schellhorn, N.A. Interactions between conventional and organic farming for biocontrol services across the landscape. *Ecol. Appl.* **2013**, *23*, 1531-1543, 10.1890/12-1819.1; WOS:000325097300002
12. \*Birkhofer, K.; Arvidsson, F.; Ehlers, D.; Mader, V.L.; Bengtsson, J.; Smith, H.G. Organic farming affects the biological control of hemipteran pests and yields in spring barley independent of landscapes complexity. *Landscape Ecol.* **2015**, *31*, 567-579, 10.1007/s10980-015-0263-8; WOS:000372319400008
13. \*Birkhofer, K.; Bezemer, T.M.; Bloem, J.; Bonkowski, M.; Christensen, S.; Dubois, D.; Ekelund, F.; Fließbach, A.; Gunst, L.; Hedlund, K.; Mäder, P.; Mikola, J.; Robin, C.; Setälä, H.; Tatin-Froux, F.; Van der Putten, W.H.; Scheu, S. Long-term organic farming fosters below and aboveground biota: Implications for soil quality, biological control and productivity. *Soil Biol. Biochem.* **2008**, *40*, 2297-2308, 10.1016/j.soilbio.2008.05.007; WOS:000259341500031
14. Björklund, J.; Araya, H.; Edwards, S.; Goncalves, A.; Höök, K.; Lundberg, J.; Medina, C. Ecosystem-Based Agriculture Combining Production and Conservation—A Viable Way to Feed the World in the Long Term? *J. Sustainable Agr.* **2012**, *36*, 824-855, 10.1080/10440046.2012.705813; WOS:000308132800006
15. \*Blaser, W.J.; Oppong, J.; Yeboah, E.; Six, J. Shade trees have limited benefits for soil fertility in cocoa agroforests. *Agr. Ecosyst. Environ.* **2017**, *243*, 83-91, 10.1016/j.agee.2017.04.007; WOS:000401391100010
16. \*Blubaugh, C.K.; Kaplan, I. Tillage compromises weed seed predator activity across developmental stages. *Biol. Control*. **2015**, *81*, 76-82, 10.1016/j.biocontrol.2014.11.007; WOS:000346852200011

17. \*Boincean, B.; Kassam, A.; Basch, G.; Reicosky, D.; González, E.; Reynolds, T.; Ilusca, M.; Cebotari, M.; Rusnac, G.; Cuzeac, V.; Bulat, L.; Pasat, D.; Stadnic, Gavrilas, S.; Boaghii, I. Towards conservation agriculture systems in Moldova. *AIMS Agriculture and Food*. **2016**, *1*, 369-386, 10.3934/agrfood.2016.4.369; WOS:000394115600001
18. \*Bonanomi, G.; De Filippis, F.; Cesarano, G.; La Stora, A.; Ercolini, D.; Scala, F. Organic farming induces changes in soil microbiota that affect agroecosystem functions. *Soil Biol. Biochem.* **2016**, *103*, 327-336, 10.1016/j.soilbio.2016.09.005; WOS:000388775400033
19. \*Brainard, D.C.; Bryant, A.; Noyes, D.C.; Haramoto, E.R.; Szendrei, Z. Evaluating pest-regulating services under conservation agriculture: A case study in snap beans. *Agr. Ecosyst. Environ.* **2016**, *235*, 142-154, 10.1016/j.agee.2016.09.032; WOS:000389296700015
20. \*Branca, G.; Hissa, H.; Benez, M.C.; Medeiros, K.; Lipper, L.; Tinlot, M.; Bockel, L.; Bernoux, M. Capturing synergies between rural development and agricultural mitigation in Brazil. *Land Use Policy*. **2013**, *30*, 507-518, 10.1016/j.landusepol.2012.04.021; WOS:000311193400051
21. \*Bravo-Monroy, L.; Tzanopoulos, J.; Potts, S.G. Ecological and social drivers of coffee pollination in Santander, Colombia. *Agr. Ecosyst. Environ.* **2015**, *211*, 145-154, 10.1016/j.agee.2015.06.007; WOS:000362049800017
22. \*Brittain, C.; Bommarco, R.; Vighi, M.; Settele, J.; Potts, S.G. Organic farming in isolated landscapes does not benefit flower-visiting insects and pollination. *Biol. Cons.* **2010**, *143*, 1860-1867, 10.1016/j.biocon.2010.04.029; WOS:000279500800006
23. \*Brunori, E.; Farina, R.; and Biasi, R. Sustainable viticulture: The carbon-sink function of the vineyard agro-ecosystem. *Agr. Ecosyst. Environ.* **2016**, *223*, 10-21, 10.1016/j.agee.2016.02.012; WOS:000375337400002
24. \*Burgio, G.; Marchesini, E.; Reggiani, N.; Montepaone, G., Schiatti, P.; Sommaggio, D. Habitat management of organic vineyard in Northern Italy: the role of cover plants management on arthropod functional biodiversity. *Bull. Entomol. Res.* **2016**, *106*, 759-768, 10.1017/S0007485316000493; WOS:000387981200007
25. Caballero-Serrano, V.; Onaindia, M.; Alday, J.G.; Caballer, D.; Carrasco, J.C.; McLaren, B.; Amigo, J. Plant diversity and ecosystem services in Amazonian homegardens of Ecuador. *Agr. Ecosyst. Environ.* **2016**, *225*, 116-125, 10.1016/j.agee.2016.04.005; WOS:000376803400012
26. \*Calvet-Mir, L.; Gómez-Baggethun, E.; Reyes-García, V. Beyond food production: Ecosystem services provided by home gardens. A case study in Vall Fosca, Catalan Pyrenees, Northeastern Spain. *Ecol. Econ.* **2012**, *74*, 153-160, 10.1016/j.ecolecon.2011.12.011; WOS:000301277000017
27. \*Campbell, A.J.; Wilby, A.; Sutton, P.; Wäckers, F. Getting more power from your flowers: milt-functional flower strips enhance pollinators and pest control agents in apple orchards. *Insects*. **2017**, *8*, 101, 10.3390/insects8030101
28. \*Caprio, E.; Nervo, B.; Isaia, M.; Allegro, G.; Rolando, A. Organic versus conventional systems in viticulture: Comparative effects on spiders and carabids in vineyards and adjacent forests. *Agr. Syst.* **2015**, *136*, 61-69, 10.1016/j.agry.2015.02.009; WOS:000354503000006
29. \*Carvalho, L.G.; Seymour, C.L.; Veldtman, R.; Nicolson, S.W. Pollination services decline with distance from natural habitat even in biodiversity-rich areas. *J. Appl. Ecol.* **2010**, *47*, 810-820, 10.1111/j.1365-2664.2010.01829.x; WOS:000279405100011
30. \*Carvalho, L.G.; Veldtman, R.; Shenkute, A.G.; Tesfay, G.B.; Walter, C.; Pirk, W.; Donaldson, J.S.; Nicolson, S.W. Natural and within-farmland biodiversity enhances crop productivity. *Ecol. Lett.* **2011**, *14*, 251-259, 10.1111/j.1461-0248.2010.01579.x; WOS:000287528600006
31. \*Caudill, S.A.; Brokaw, J.N.; Doublet, D.; Rice, R.A. Forest and trees: Shade management, forest proximity and pollinator communities in southern Costa Rica coffee agriculture. *Renewable Agric. Food Syst.* **2016**, *32*, 417-427, 10.1017/S1742170516000351; WOS:000417418300004
32. \*Cerdeira, R.; Allinne, C.; Gary, C.; Tixier, P.; Harvey, C.A.; Krolczyk, L.; Mathiot, C.; Clément, E.; Aubertot, J.; Avelino, J. Effects of shade, altitude and management on multiple ecosystem services in coffee agroecosystems. *Europ. J. Agronomy.* **2016**, *82*, 308-319, 10.1016/j.eja.2016.09.019; WOS:000390965100009

33. \*Chabert, A.; Sarthou, J. Practices of conservation agriculture prevail over cropping systems and landscape heterogeneity in understanding the ecosystem service of aphid biocontrol. *Agr. Ecosyst. Environ.* **2017**, *249*, 70-79, 10.1016/j.agee.2017.08.005; WOS:000412256000009
34. \*de Souza, H.N.; de Graaff, J.; Pulleman, M.M. Strategies and economics of farming systems with coffee in the Atlantic Rainforest Biome. *Agrofor. Syst.* **2012**, *84*, 227-242, 10.1007/s10457-011-9452-x; WOS:000300312900009
35. \*Degruene, F.; Theodorakopoulou, N.; Colinet, G.; Hiel, M.-P.; Bodson, B.; Taminiau, B.; Daube, G.; Vandenbol, M.; Hartmann, M. Temporal dynamics of soil microbial communities below the seedbed under two contrasting tillage regimes. *Front. Microbiol.* **2017**, *8*, 10.3389/fmicb.2017.01127; WOS:000403539000002
36. \*Depalo, L.; Burgio, G.; von Fragstein, P.; Kristensen, H.L.; Bavec, M.; Robacer, M.; Campanelli, G.; Canali, S. Impact of living mulch on arthropod fauna: analysis of pest and beneficial dynamics on organic cauliflower (*Brassica oleracea* L. var. *botrytis*) in different European scenarios. *Renewable Agric. Food Syst.* **2016**, *32*, 240-247, 10.1017/S1742170516000156; WOS:000400672500005
37. \*Diekötter, T.; Wamser, S.; Dörner, T.; Wolters, V.; Birkhofer, K. Organic farming affects the potential of a granivorous carabid beetle to control arable weeds at local and landscape scales. *Agr. Forest Entomol.* **2016**, *18*, 167-173, 10.1111/afe.12150; WOS:000373777800009
38. \*Diekötter, T.; Wamser, S.; Wolters, V.; Birkhofer, K. Landscape and management effects on structure and function of soil arthropod communities in winter wheat. *Agr. Ecosyst. Environ.* **2010**, *137*, 108-112, 10.1016/j.agee.2010.01.008; WOS:000277742200014
39. \*Evans, T.A.; Gleeson, P.V. Direct measurement of ant predation of weed seeds in wheat cropping. *J. Appl. Ecol.* **2016**, *53*, 1177-1185, 10.1111/1365-2664.12640; WOS:000380065600022
40. Eyre, M.D.; Luff, M.L.; Leifert, C. Crop, field boundary, productivity and disturbance influences on ground beetles (Coleoptera, Carabidae) in the agroecosystem. *Agr. Ecosyst. Environ.* **2013**, *165*, 60-67, 10.1016/j.agee.2012.12.009; WOS:000315550100007
41. \*Eyre, M.D.; Luff, M.L.; Atlihan, R.; Leifert, C. Ground beetle species (*Carabidae*, *Coleoptera*) activity and richness in relation to crop type, fertility management and crop protection in a farm management comparison trial. *Ann. Appl. Biol.* **2012**, *161*, 169-179, 10.1111/j.1744-7348.2012.00562.x; WOS:000307046000008
42. \*Fan, F.; Henriksen, C.B.; Porter, J. Valuation of ecosystem services in organic cereal crop production systems with different management practices in relation to organic matter input. *Ecosyst. Serv.* **2016**, *22*, 117-127, 10.1016/j.ecoser.2016.10.007; WOS:000390691200013
43. \*Ferris, H.; Sánchez-Moreno, S.; Brennan, E.B. Structure, functions and interguild relationships of the soil nematode assemblage in organic vegetable production. *Appl. Soil. Ecol.* **2012**, *61*, 16-25, 10.1016/j.apsoil.2012.04.006; WOS:000309789700003
44. \*Firbank, L.G.; Elliott, J.; Drake, B.; Cao, Y.; Gooday, R. Evidence of sustainable intensification among British farms. *Agr. Ecosyst. Environ.* **2013**, *173*, 58-65, 10.1016/j.agee.2013.04.010; WOS:000321476100007
45. \*Fischer, C.; Thies, C.; Tschamntke, T. Mixed effects of complexity and farming practice on weed seed removal. *Perspect. Plant Ecol. Syst.* **2011**, *13*, 297-303, 10.1016/j.ppees.2011.08.001; WOS:000297780300006
46. \*Forrest, J.R.K.; Thorp, R.W.; Kremen, C.; Williams, N.M. Contrasting patterns in species and functional-trait diversity of bees in an agricultural landscape. *J. Appl. Ecol.* **2015**, *52*, 706-715, 10.1111/1365-2664.12433; WOS:000354811700018
47. Gabriel, D.; Sait, S.M.; Hodgson, J.A.; Schmutz, U.; Kunin, W.E.; Benton, T.G. Scale matters: the impact of organic farming on biodiversity at different spatial scales. *Ecol. Lett.* **2012**, *13*, 858-869, 10.1111/j.1461-0248.2010.01481.x; WOS:000278798100009
48. \*Gagic, V.; Hanke, S.; Thies, C.; Scherber, C.; Tomanovic, Z.; Tschamntke, T. Agricultural intensification and cereal aphid-parasitoid-hyperparasitoid food webs: network complexity, temporal variability and parasitism rates. *Oecologia* **2012**, *170*, 1099-1109, 10.1007/s00442-012-2366-0; WOS:000310999400021
49. \*Gaigher, R.; Samways M.J. Surface-active arthropods in organic vineyards, integrated vineyards and natural habitat in the Cape Floristic Region. *J. Insect. Conserv.* **2010**, *14*, 595-605, 10.1007/s10841-010-9286-2; WOS:000284073800002

50. Garbach, K.; Morgan, G.P. Grower networks support adoption of innovations in pollination management: the roles of social learning, technical learning, and personal experience. *J. Environ. Manage.* **2017**, *204*, 39-49, 10.1016/j.jenvman.2017.07.077; WOS:000413878300006
51. \*Garfinkel, M.; Johnson, M. Pest-removal services provided by birds on small organic farms in northern California. *Agr. Ecosyst. Environ.* **2015**, *211*, 24-31, 10.1016/j.agee.2015.04.023; WOS:000362049800004
52. \*Garratt, M.P.D.; Senapathi, D.; Coston, D.J.; Mortimer, S.R.; Potts, S.G. The benefits of hedgerows for pollinators and natural enemies depends on hedge quality and landscape context. *Agr. Ecosyst. Environ.* **2017**, *247*, 363-370, 10.1016/j.agee.2017.06.048; WOS:000408597800040
53. Gbedomon, R.C.; Salako, V.K.; Fandohan, A.B.; Idohou, A.F.R.; Kakai, R.G.; Assogbadjo, A.E. Functional diversity of home gardens and their agrobiodiversity conservation benefits in Benin, West Africa. *J. Ethnobiol. Ethnomed.* **2017**, *13*, 66, 10.1186/s13002-017-0192-5; WOS:000416181200001
54. \*Ghaley, B. B.; Porter, J. R. Emergy synthesis of a combined food and energy production system compared to a conventional wheat (*Triticum aestivum*) production system. *Ecol. Indic.* **2013**, *24*, 534-542, 10.1016/j.ecolind.2012.08.009; WOS:000311059900059
55. \*Ghaley, B.B.; Sandhu, H.S.; Porter, J.R. Relationships between C:N/C:O stoichiometry and ecosystem services in managed production systems. *Plos One.* **2015**, *10*, 10.1371/journal.pone.0123869; WOS:000353211700061
56. \*Gill, K.A.; Cox, R.; O'Neal, M.E. Quality over quantity: buffer strips can be improved with select native plant species. *Environ. Entomol.* **2014**, *43*, 298-311, 10.1603/EN13027; WOS:000337694500006
57. \*Gkissakis, V.; Volakakis, N.; Kollaros, D.; Barberi, P.; Kabourakis, E.M. Soil arthropod community in the olive agroecosystem: Determined by environment and farming practices in different management systems and agroecological zones. *Agr. Ecosyst. Environ.* **2016**, *218*, 178-189, 10.1016/j.agee.2015.11.026, WOS:000369463100019
58. \*Glover, J. D.; Culman, S. W.; DuPont, S.T.; Broussard, W.; Young, L.; Mangan, M. E.; Mai, J. G.; Crews, T. E.; DeHaan, L. R.; Buckley, D. H.; Ferris, H.; Turner, R. E.; Reynolds, H.L.; Wyse, D. L. Harvested perennial grasslands provide ecological benchmarks for agricultural sustainability. *Agr. Ecosyst. Environ.* **2010**, *137*, 3-12, 10.1016/j.agee.2009.11.001; WOS:000277742200002
59. \*Gopalakrishnan, G.; Negri, M.C.; Salas, W. Modeling biogeochemical impacts of bioenergy buffers with perennial grasses for a row-crop field in Illinois. *Glob. Change Biol. Bioenergy.* **2012**, *4*, 739-750, 10.1111/j.1757-1707.2011.01145.x; WOS:000309450100015
60. \*Gottshall, C.B.; Cooper, M.; Emery, S.M. Activity, diversity and function of arbuscular mycorrhizae vary with changes in agricultural management intensity. *Agr. Ecosyst. Environ.* **2017**, *241*, 142-149, 10.1016/j.agee.2017.03.011; WOS:000404320400014
61. \*Grab, H.; Blitzler, E.J.; Danforth, B.; Loeb, G.; Poveda, K. Temporally dependent pollinator competition and facilitation with mass flowering crops affects yield in co-blooming crops. *Sci. Rep.* **2017**, *7*, 45296, 10.1038/srep45296; WOS:000397539100001
62. Grala, R.K.; Tyndall, J.C.; Mize, C.W. Willingness to pay for aesthetics associated with field windbreaks in Iowa, United States. *Landsc. Urban Plan.* **2012**, *7*, 45296, 10.1016/j.landurbplan.2012.07.005; WOS:000310821900001
63. Grashof-Bokdam, C.J.; Cormont, A.; Polman, N.B.P.; Westerhof, E.J.G.M.; Franke, J.G.J.; Opdam, P.F.M. Modelling shifts between mono- and multifunctional farming systems: the importance of social and economic drivers. *Landsc. Ecol.* **2017**, *32*, 595-607, 10.1007/s10980-016-0458-7; WOS:000394327200009
64. Gregory, M.M.; Leslie, T.W.; Drinkwater, L.E. Agroecological and social characteristics of New York city community gardens: contributions to urban food security, ecosystem services, and environmental education. *Urban Ecosyst.* **2015**, *19*, 763-794, 10.1007/s11252-015-0505-1; WOS:000382671000016
65. \*Häger, A. The effects of management and plant diversity on carbon storage in coffee agroforestry systems in Costa Rica. *Agroforest. Syst.* **2012**, *86*, 159-174, 10.1007/s10457-012-9545-1; WOS:000309670200005
66. \*Häger, A.; Fernández Otárola, M.; Stuhlmacher, M.F.; Acuña Castillo, R.; Contreras Arias, A. Effects of management and landscape composition on the diversity and structure of tree species assemblages in coffee agroforests. *Agr. Ecosyst. Environ.* **2014**, *199*, 43-51, 10.1016/j.agee.2014.08.022; WOS:000348015400005

67. \*Harterreiten-Souza, E.S.; Togni, P.H.B.; Pires, C.S.S.; Sujii, E.R. The role of integrating agroforestry and vegetable planting in structuring communities of herbivorous insects and their natural enemies in the Neotropical region. *Agroforest. Syst.* **2014**, *88*, 205-219, 10.1007/s10457-013-9666-1; WOS:000334409600002
68. \*Holzschuh, A.; Steffan-Dewenter, I.; Kleijn, D.; Tscharnkte, T. Diversity of flower-visiting bees in cereal fields: effects of farming system, landscape composition and regional context. *J. Appl. Ecol.* **2007**, *44*, 41-49, 10.1111/j.1365-2664.2006.01259.x; WOS:000243023600006
69. \*Holzshuh, A.; Steffan-Dewenter, I.; Tscharnkte, T. Agricultural landscapes with organic crops support higher pollinator diversity. *Oikos*. **2008**, *117*, 354-361, 10.1111/j.2007.0030-1299.16303.x; WOS:000253634100005
70. \*Isaacs, K.B.; Snapp, S.S.; Chung, K.; Waldman, K.B. Assessing the value of diverse cropping systems under a new agricultural policy environment in Rwanda. *Food Sec.* **2016**, *8*, 491-506, 10.1007/s12571-016-0582-x; WOS:000379175500004
71. Jacobi, J. Agroforestry in Bolivia: opportunities and challenges in the context of food security and food sovereignty. *Environ. Conserv.* **2016**, *43*, 307-316, 10.1017/S0376892916000138; WOS:000387551700001
72. \*Jedlicka, J.A.; Greenberg, R.; Letourneau, D.K. Avian Conservation Practices Strengthen Ecosystem Services in California Vineyards. *PlosOne*. **2011**, *6*, e27347, 10.1371/journal.pone.0027347; WOS:000297350800046
73. \*Jonason, D.; Smith, H.G.; Bengtsson, J.; Birkhofer, K. Landscape simplification promotes weed seed predation by carabid beetles (Coleoptera: Carabidae). *Landsc. Ecol.* **2013**, *28*, 487-494, 10.1007/s10980-013-9848-2; WOS:000316290100010
74. \*Jones, M.S.; Halteman, W.A.; Drummond, F.A. Predator- and scavenger-mediated ecosystem services determined by distance to field-forest interface in the marine lowbush blueberry agroecosystem. *Environ. Entomol.* **2016**, *45*, 1131-1140, 10.1093/ee/nvw082; WOS:000386053100005
75. \*Jonsson, M.; Bommarco, R.; Ekbom, B.; Smith, H.G.; Bengtsson, J.; Caballero-Lopez, B.; Winqvist, C.; Olsson, O. Ecological production functions for biological control services in agricultural landscapes. *Methods Ecol. Evol.* **2014**, *5*, 243-252, 10.1111/2041-210X.12149; WOS:000332517100005
76. \*Julier, H.E.; Roulston, T.H. Wild bee abundance and pollination service in cultivated pumpkins: Farm management, nesting behavior and landscape effects. *J. Econ. Entomol.* **2009**, *102*, 563-573, 10.1603/029.102.0214; WOS:000264899500015
77. \*Kang, W.; Hoffmeister, M.; Martin, E.A.; Steffan-Dewenter, I.; Han, D.; Lee, D. Effects of management and structural connectivity on the plant communities of organic vegetable field margins in South Korea. *Ecol. Res.* **2013**, *28*, 991-1002, 10.1007/s11284-013-1081-6; WOS:000327457000007
78. \*Karp, D.S.; Moses, R.; Gennet, S.; Jones, M.S.; Joseph, S.; M'Gonigle, L.K.; Ponisio, L.C.; Snyder, W.E.; Kremen, C. Agricultural practices for food safety threaten pest control services for fresh produce. *J. Appl. Ecol.* **2016**, *53*, 1402-1412, 10.1111/1365-2664.12707; WOS:000387773000012
79. \*Kaufman, A.H. Unraveling the differences between organic and non-organic Thai rice farmers' environmental views and perceptions of well-being. *J. Agr. Food Syst. Community Dev.* **2015**, *5*, 29-47, 10.5304/jafscd.2015.054.002; WOS:000389227700005
80. \*Klein, A.M.; Brittain, C.; Hendrix, S.D.; Thorp, R.; Williams, N.; Kremen, C. Wild pollination services to California almond rely on semi-natural habitat. *J. Appl. Ecol.* **2012**, *49*, 723-732, 10.1111/j.1365-2664.2012.02144.x; WOS:000304660500023
81. \*Klein, L.R.; Hendrix, W.G.; Lohr, V.I.; Kaytes, J.B.; Sayler, R.D.; Swanson, M.E.; Elliot, W.J.; Reganold, J.P. Linking ecology and aesthetics in sustainable agricultural landscapes: lessons from the Palouse region of Washington, U.S.A. *Landsc. Urban Plan.* **2015**, *134*, 195-209, 0.1016/j.landurbplan.2014.10.019; WOS:000347511400020
82. \*Klein, T.; Holzkämper, A.; Calanca, P.; Fuhrer, J. Adaptation options under climate change for multifunctional agriculture: a simulation study for western Switzerland. *Reg. Environ. Chang.* **2014**, *14*, 167-184, 10.1007/s10113-013-0470-2; WOS:000333261900015
83. \*Kragt, M.E.; Robertson, M.J. Quantifying ecosystem services trade-offs from agricultural practices. *Ecol. Econ.* **2014**, *102*, 147-157, 10.1016/j.ecolecon.2014.04.001; WOS:000336697600018

84. \*Krauss, J.; Gallenberger, I.; Steffan-Dewenter, I. Decreased functional diversity and biological pest control in conventional compared to organic crop fields. *Plos One*. **2011**, *6*, 10.1371/journal.pone.0019502; WOS:000290720200008
85. \*Kremen, C.; Williams, N.M.; Thorp, R.W. Crop pollination from native bees at risk from agricultural intensification. *Proc. Natl. Sci. USA*. **2002**, *99*, 16812-16816, 10.1073/pnas.262413599; WOS:000180101600056
86. \*Kremen, C.; Williams, N.M.; Bugg, R.L.; Fay, J.P.; Thorp, R.W. The area requirements of an ecosystem service: crop pollination by native bee communities in California. *Ecol. Lett.* **2004**, *7*, 1109-1119, 10.1111/j.1461-0248.2004.00662.x; WOS:000224399400011
87. \*Kremer, R.J.; Hezel, L.F. Soil quality improvement under an ecologically based farming system in northwest Missouri. *Renew. Agr. Food Syst.* **2012**, *28*, 245-254, 10.1017/S174217051200018X; WOS:000322920200005
88. \*Kritee, K.; Nair, D.; Tiwari, R.; Rudek, J.; Ahuja, R.; Adhya, T.; Loecke, T.; Hamburg, S.; Tetaert, F.; Reddy, S.; Dava, O. Groundnut cultivation in semi-arid peninsular India for yield scaled nitrous oxide emission reduction. *Nutr. Cycl. Agroecosys.* **2015**, *103*, 115-129, 10.1007/s10705-015-9725-2; WOS:000361433200009
89. \*Kuntz, M.; Berner, A.; Gattinger, A.; Scholberg, J.M.; Mäder, P.; Pfiffner, L. Influence of reduced tillage on earthworm and microbial communities under organic arable farming. *Pedobiologia*. **2013**, *56*, 251-260, 10.1016/j.pedobi.2013.08.005; WOS:000328526500012
90. Lal, R. Restoring Soil Quality to Mitigate Soil Degradation. *Sustainability*. **2015**, *7*, 5875-5895, 10.3390/su7055875; WOS:000356936200054
91. \*Lavelle, P.; Dolédec, S.; de Sartre, X.A.; Decaëns, T.; Gond, V.; Grimaldi, M.; Oszwald, J.; Hubert, B.; Ramirez, B.; Veiga, I.; de Souza, S.; de Assis, W.S.; Michelotti, F.; Martins, M.; Feijoo, A.; Bommel, P.; Castañeda, E.; Chacon, P.; Desjardins, T.; Dubs, F.; Gordillo, E.; Guevara, E.; Fonte, S.; Hurtado, M.P.; Lena, P.; Lima, T.; Marichal, R.; Mitja, D.; Miranda, I.; Otero, T.; Praxedes, C.; Pocard, R.; de Robert, P.; Rodriguez, G.; Sanabria, C.; Tselouiko, S.; Velasquez, A.; Velasquez, E.; Velasquez, J. Unsustainable landscapes of deforested Amazonia: an analysis of the relationships among landscapes and the social, economic and environmental profiles of farms at different ages following deforestation. *Global Environ. Chang.* **2016**, *40*, 137-155, 10.1016/j.gloenvcha.2016.04.009; WOS:000383297200013
92. \*Létorneau, D.K.; Allen, S.G.B.; Ill, J.O.S. Perennial habitat fragments, parasitoid diversity and parasitism in ephemeral crops. *J. Appl. Ecol.* **2012**, *49*, 1405-1416, 10.1111/jpe.12001; WOS:000311855000022
93. \*Lewis, M.T.; Fleischer, S.J.; Roberts, D.C. Horticultural production systems influence ground beetle (Coleoptera: Carabidae) distribution and diversity in cucurbits. *Environ. Entomol.* **2016**, *45*, 559-569, 10.1093/ee/nvw013; WOS:000381910800003
94. Liu, Y.L.; Chang, K.-T.; Stoorvogel, J.; Verburg, P.; Sun, C.H. Evaluation of agricultural ecosystem services in fallowing land based on farmers' participation and model simulation. *Paddy Water Environ.* **2012**, *10*, 301-310, 10.1007/s10333-011-0282-2; WOS:000311676000005
95. \*Lorin, M.; Jeuffroy, M.-H.; Butier, A.; Valantin-Morrison, M. Undersowing winter oilseed rape with frost-sensitive living mulches to improve weed control. *Europ. J. Agronomy*. **2015**, *71*, 96-105, 10.1016/j.eja.2015.09.001; WOS:000364606000010
96. Lovell, S.T.; DeSantis, S.; Nathan, C.A.; Olson, M.B.; Méndez, E.; Kominami, H.C.; Erickson, D.L.; Morris, K.S.; Morris W.B. Integrating agroecology and landscape multifunctionality in Vermont: an evolving framework to evaluate the design of agroecosystems. *Agr. Syst.* **2010**, *103*, 327-341, 10.1016/j.agry.2010.03.003; WOS:000278244800009
97. Lovell, S.T.; Méndez, V.E.; Erickson, D.L.; Nathan, C.; DeSantis, S. Extent, pattern, and multifunctionality of treed habitats on farms in Vermont, USA. *Agroforest. Syst.* **2010**, *80*, 153-171, 10.1007/s10457-010-9328-5; WOS:000281713300001
98. \*Lugnot, M.; Martin, G. Biodiversity provides ecosystem services: scientific results versus stakeholders' knowledge. *Reg. Environ. Change*. **2013**, *13*, 1145-1155, 10.1007/s10113-013-0426-6; WOS:000327501900002

99. \*Macfadyen, S.; Craze, P.G.; Polaszek, A.; van Achterberg, K.; Memmott, J. Parasitoid diversity reduces the variability in pest control services across time on farms. *Proc. R. Soc. B.* **2011**, *278*, 3387-3394, 10.1098/rspb.2010.2673; WOS:000296290400010
100. \*Macfadyen, S.; Gibson, R.H.; Symondson, W.O.C.; Memmott, J. Landscapes structure influences modularity patterns in far food webs: consequences for pest control. *Ecol. Appl.* **2011**, *21*, 516-524, 10.1890/09-2111.1; WOS:000263520100007
101. \*MacLeod, C.J.; Blackwell, G.; Bengé, J. Reduced pesticide toxicity and increased woody vegetation cover account for enhanced native bird densities in organic orchards. *J. Appl. Ecol.* **2012**, *49*, 652-660, 10.1111/j.1365-2664.2012.02135.x; WOS:000304660500015
102. \*Magbanua, F.S.; Townsend, C.R.; Blackwell, G.L.; Phillips, N.; Matthaei, C.D. Responses of stream macroinvertebrates and ecosystem function to conventional, integrated and organic farming. *J. Appl. Ecol.* **2010**, *47*, 1014-1025, 10.1111/j.1365-2664.2010.01859.x; WOS:000281286800007
103. Magrini, M.B.; Anton, M.; Cholez, C.; Corre-Hellou, G.; Duc, G.; Jeuffroy, M.H.; Meynard, J.-M.; Pelzer, E.; Voisin, A.-S.; Walrand, S. Why are grain-legumes rarely present in cropping systems despite their environmental and nutritional benefits? Analyzing lock-in in the French agrifood system. *Ecol. Econ.* **2016**, *126*, 152-162, 10.1016/j.ecolecon.2016.03.024; WOS:000376215400015
104. Makate, C.; Makate, M.; Mango, N. Sustainable agriculture practices and livelihoods in pro-poor smallholder farming systems in southern Africa. *African Journal of Science, Technology, Innovation and Development.* **2017**, *9*, 269-279, 10.1080/20421338.2017.1322350; WOS:000404931500005
105. Marquardt, K.; Vico, G.; Glynn, C.; Weih, M.; Eksvård, K.; Dalin, P.; Björkman, C. Farmer perspectives on introducing perennial cereal in Swedish farming systems: a sustainability analysis of plant traits, farm management, and ecological implications. *Agoecol. Sust. Food.* **2016**, *40*, 432-450, 10.1080/21683565.2016.1141146; WOS:000372085700003
106. \*McCune, N.M.; González, Y.R.; Alcántara, E.A.; Martínez, O.F.; Fundora, C.O.; Arzola, N.C.; Cairo, P.C.; D'Haese, M.; DeNeve, S.; Hernández, F.G. Global questions, local answers: soil management and sustainable intensification in diverse socioeconomic contexts of Cuba. *J. Sustain. Agr.* **2011**, *35*, 650-670, 10.1080/10440046.2011.586595; WOS:000295124900006
107. \*Meehan, T.D.; Gratton, C.; Diehl, E.; Hunt, N.D.; Mooney, F.; Ventura, S.J.; Barham, B.L.; Jackson, R.D. Ecosystem-service tradeoffs associated with switching from annual to perennial energy crops in riparian zones of the US Midwest. *PlosOne.* **2013**, *8*, e80093, 10.1371/journal.pone.0080093; WOS:000326656200108
108. Merlín-Urbe, Y.; González-Esquível, C.E.; Contreras-Hernández, A.; Zambrano, L.; Moreno-Casasola, P.; Astier, M. Environmental and socio-economic sustainability of chinampas (raised beds) in Xochimilco, Mexico City. *Int. J. Agr. Sustain.* **2013**, *1-18*, 10.1080/14735903.2012.726128; WOS:000321484800002
109. Migléc, T.; Valkó, O.; Török, P.; Deák, B.; Kelemen, A.; Donkó, Á.; Drexler, D.; Tóthmérész, B. Establishment of three cover crop mixtures in vineyards. *Sci. Hortic.* **2015**, *197*, 117-123, 10.1016/j.scienta.2015.09.017; WOS:000367411400014
110. \*Mody, K.; Spoerndli, C.; Dorn, S. Within-orchard variability of the ecosystem service "parasitism": effects of cultivars, ants and tree location. *Basic Appl. Ecol.* **2011**, *12*, 456-465, 10.1016/j.baee.2011.05.005; WOS:000294742400009
111. \*Monagan, I.V.; Morris, J.R.; Davis Rabosky, A.R.; Perfecto, I.; Vandermeer, J. Anolis lizards as biocontrol agents in mainland and island agroecosystems. *Ecol. Evol.* **2017**, *7*, 2193-2203, 10.1002/ece3.2806; WOS:000399738700017
112. \*Montemurro, F.; Diacono, M.; Ciaccia, C.; Campanelli, G.; Tittarelli, F.; Leteo, F.; Canali, S. Effectiveness of living mulch strategies for Winter organic cauliflower (*Brassica oleracea* L. var. botrytis) production in Central and Southern Italy. *Renewable Agr. Food Syst.* **2016**, *32*, 263-272, 10.1017/S1742170516000107; WOS:000400672500007
113. Moraine, M.; Duru, M.; Therond, O. A social-ecological framework for analyzing and designing integrated crop-livestock systems from farm to territory levels. *Renewable Agric. Food Syst.* **2016**, *32*, 43-56, 10.1017/S1742170515000526; WOS:000407772500005

114. Moraine, M.; Grimaldi, J.; Murgue, C.; Duru, M.; Therond, O. Co-design and assessment of cropping systems for developing crop-livestock integration at the territory level. *Agr. Syst.* **2016**, *147*, 87-97, 10.1016/j.agsy.2016.06.002; WOS:000380418900008
115. \*Naab, J.B.; Mahama, G.Y.; Yahaya, I.; Prasad, P.V.V. Conservation agriculture improves soil quality, crop yield, and incomes of smallholder farmers in North Western Ghana. *Front. Plant Sci.* **2017**, *8*, 996, 10.3389/fpls.2017.00996; WOS:000403810800001
116. \*Navntoft, S.; Wratten, S.D.; Kristensen, K.; Esbjerg, P. Weed seed predation in organic and conventional fields. *Biol. Control.* **2009**, *49*, 11-16, 10.1016/j.biocontrol.2008.12.003; WOS:000264310000003
117. \*Niles, J.O.; Brown, S.; Pretty, J.; Ball, A.S.; Fay, J. Potential carbon mitigation and income in developing countries from changes in use and management of agricultural and forest lands. *Phil. Trans. R. Soc. Lond. A.* **2002**, *326*, 1621-1639, 10.1098/rsta.2002.1023; WOS:000177340500005
118. \*Oehl, F.; Sieverding, E.; Mäder, P.; Dubois, D.; Ineichen, K.; Boller, T.; Wiemken, A. Impact of long-term conventional and organic farming on the diversity of arbuscular mycorrhizal fungi. *Oecologia.* **2004**, *138*, 574-583, 10.1007/s00442-003-1458-2; WOS:000220365700010
119. Öhlund, E.; Hammer, M.; Björklund, J. Managing conflicting goals in pig farming: farmers' strategies and perspectives on sustainable pig farming in Sweden. *Int. J. Agr. Sustain.* **2017**, *15*, 693-707, 10.1080/14735903.2017.1399514; WOS:000418934400006
120. \*Östman, Ö.; Ekbom, B.; Bengtsson, J. Landscape heterogeneity and farming practice influence biological control. *Basic Appl. Ecol.* **2001**, *2*, 365-371, 10.1078/1439-1791-00072; WOS:000172713900008
121. \*Pak, D.; Iverson, A.L.; Ennis, K.K.; Gonthier, D.J.; Vandermeer, J.H. Parasitoid wasps benefit from shade tree size and landscape complexity in Mexican coffee agroecosystems. *Agr. Ecosyst. Environ.* **2015**, *206*, 21-32, 10.1016/j.agee.2015.03.017; WOS:000353601500003
122. \*Parras-Alcántara, L.; Díaz-Jaimes, L.; Lozano-García, B.; Fernández-Rebollo, P.; Moreno-Elcure, F.; Carbonero-Muñoz, M.D. Organic farming has little effect on carbon stock in a Mediterranean dehesa (southern Spain). *CATENA.* **2014**, *113*, 9-17, 10.1016/j.catena.2013.09.002; WOS:000328237500002
123. \*Peisley, R.K.; Saunders, M.E.; Luck, G.W. Cost-benefit trade-offs of bird activity in apple orchards. *PeerJ.* **2016**, *4*, 10.7717/peerj.2179; WOS:000378797400004
124. \*Pennington, T.; Kraus, C.; Alakina, E.; Entling, M.H.; Hoffmann, C. Minimal pruning and reduced plant protection promote predatory mites in grapevine insects. **2017**, *8*, 86, 10.3390/insects8030086
125. \*Petit, S.; Trichard, A.; Biju-Duval, L.; McLaughlin, Ó.B.; Bohan, D.A. Interactions between conservation agricultural practice and landscape composition promote weed seed predation by invertebrates. *Agr. Ecosyst. Environ.* **2017**, *240*, 45-53, 10.1016/j.agee.2017.02.014, WOS:000398645900005
126. \*Pfister, S.C.; Schirmel, J.; Entling, M.H. Aphids and their enemies in pumpkin respond differently to management, local and landscape features. *Biol. Control.* **2017**, *115*, 37-35, 10.1016/j.biocontrol.2017.09.005; WOS:000415670600006
127. \*Piccoli, I.; Chiarini, F.; Carletti, P.; Furlan, L.; Lazzaro, B.; Nardi, S.; Berti, A.; Sartori, L.; Dalconi, M.C.; Morari, F. Disentangling the effects of conservation agriculture practices on the vertical distribution of soil organic carbon. Evidence of poor carbon sequestration in North-Eastern Italy. *Agr. Ecosyst. Environ.* **2016**, *230*, 68-78, 10.1016/j.agee.2016.05.035; WOS:000381834500008
128. \*Pizzigallo, A.C.I.; Granai, C.; Borsa, S. The joint use of LCA and emergy evaluation for the analysis of two Italian wine farms. *J. Environ. Manage.* **2008**, *86*, 396-406, 10.1016/j.jenvman.2006.04.020; WOS:000251509200009
129. Poppenborg, P.; Koellner, T. Do attitudes toward ecosystem services determine agricultural land use practices? An analysis of farmers' decision-making in a South Korean watershed. *Land Use Policy.* **2013**, *31*, 422-429, 10.1016/j.landusepol.2012.08.007; WOS:000313318000043
130. \*Power, E.F.; Jackson, Z.; Stout, J.C. Organic farming and landscape factors affect abundance and richness of hoverflies (Diptera, Syrphidae) in grasslands. *Insect Conserv. Diver.* **2016**, *9*, 244-253, 10.1111/icad.12163; WOS:000375672400008
131. \*Puech, C.; Poggi, S.; Baudry, J.; Aviron, S. Do farming practices affect natural enemies at the landscape scale? *Landsc. Ecol.* **2014**, *30*, 125-140, 10.1007/s10980-014-0103-2; WOS:000347284600010



132. \*Quintanilla-Tornel, M.A.; Wang, K.H.; Tavares, J.; Hooks, C.R.R. Effects of mulching on above and below ground pests and beneficials in a green onion agroecosystem. *Agr. Ecosyst. Environ.* **2016**, *224*, 75-85, 10.1016/j.agee.2016.03.023; WOS:000375809900009
133. \*Quist, C.W.; Schrama, M.; de Haan, J.J.; Smant, G.; Bakker, J.; van der Putten, W.H.; Helder, J. Organic farming practices result in compositional shifts in nematode communities that exceed crop-related changes. *Appl. Soil Ecol.* **2016**, *98*, 254-260, 10.1016/j.apsoil.2015.10.02; WOS:000365998100027
134. \*Rankinen, K.; Granlund, K.; Etheridge, R.; Seuri, P. Valuation of nitrogen retention as an ecosystem service on a catchment scale. *Hydrol. Res.* **2014**, *45*, 411-424, 10.2166/nh.2013.239; WOS:000338913600010
135. \*Regan, J.T.; Marton, S.; Barrantes, O.; Ruane, E.; Hanegraaf, M.; Berland, J.; Korevaar, H.; Pellerin, S.; Nesme, T. Does the recoupling of dairy and crop production via cooperation between farms generate environmental benefits? A case-study approach in Europe. *Eur. J. Agron.* **2016**, *82*, 342-356, 10.1016/j.eja.2016.08.005; WOS:000390965100012
136. Richards, M.B.; Méndez, V.E. Interactions between carbon sequestration and shade tree diversity in a smallholder coffee cooperative in El Salvador. *Conserv. Biol.* **2014**, *28*, 489-497, 10.1111/cobi.12181; WOS:000332923500020
137. \*Roubinet, E.; Birkhofer, K.; Malsher, G.; Staudacher, K.; Ekbom, B.; Traugott, M.; Jonsson, M. Diet of generalist predators reflects effects of cropping period and farming system on extra-and intraguild prey. *Ecol. Appl.* **2017**, *27*, 1167-1177, 10.1002/eap.1510; WOS:000402566600011
138. Rousseau, L.; Fonte, S.J.; Téllez, O.; van der Hoek, R.; Lavelle, P. Soil macrofauna as indicators of soil quality and land use impacts in smallholder agroecosystems of western Nicaragua. *Ecol. Indic.* **2013**, *27*, 71-82, 10.1016/j.ecolind.2012.11.020; WOS:000314201700009
139. \*Rusch, A.; Birkhofer, K.; Bommarco, R.; Smith, H.G.; Ekbom, B. Management intensity at field and landscape levels affects the structure of generalist predator communities. *Oecologia.* **2014**, *175*, 971-983, 10.1007/s00442-014-2949-z; WOS:000338202600020
140. \*Rusch, A.; Bommarco, R.; Chiverton, P.; Öberg, S.; Wallin, H.; Wikteliuss, S.; Ekbom, B. Response of ground beetle (Coleoptera, Carabidae) communities to changes in agricultural policies in Sweden over two decades. *Agr. Ecosyst. Environ.* **2013**, *176*, 63-69, 10.1016/j.agee.2013.05.014; WOS:000322859600007
141. \*Rusch, A.; Delbac, L.; Muneret, L.; Thiéry, D. Organic farming and host density affect parasitism rates of tortricid moths in vineyards. *Agr. Ecosyst. Environ.* **2015**, *214*, 46-53, 10.1016/j.agee.2015.08.019; WOS:000362608400005
142. \*Rutgers, M.; van Wijnen, H.J.; Schouten A.J.; Mulder, C.; Kuiten, A.M.P.; Brussaard, L.; Breure, A.M. A method to assess ecosystem services developed from soil attributes with stakeholders and data of four arable farms. *Sci. Total Environ.* **2012**, *415*, 39-48, 10.1016/j.scitotenv.2011.04.041; WOS:000300388700005
143. \*Sagie, H.; Ramon, U. Using an agroecosystem services approach to assess tillage methods: a case study in the Shikma Region. *Land.* **2015**, *4*, 938-956, 10.3390/land4040938; WOS:000367727700002
144. \*Sandhu, H.; Wratten, S.; Costanza, R.; Pretty, J.; Porter, J.R.; Reganold, J. Significance and value of non-traded ecosystem services on farmland. *PeerJ.* **2015**, *3*, 10.7717/peerj.762; WOS:000349543500004
145. \*Saunders, M.E.; Luck, G.W.; Mayfield, M.M. Almond orchards with living ground cover host more wild insect pollinators. *J. Insect Conserv.* **2013**, *17*, 1011-1025, 10.1007/s10841-013-9584-6; WOS:000324643300015
146. \*Schipanski, M.E.; Smith, R.G.; Pisani Gareau, T.L.; Jabbour, R.; Lewis, D.B.; Barbercheck, M.E.; Mortensen, D.A.; Kaye, J.P. Multivariate relationships influencing crop yields during the transition to organic management. *Agr. Ecosyst. Environ.* **2014**, *189*, 119-126, 10.1016/j.agee.2014.03.037; WOS:000336821200014
147. \*Schmidt, A.; John, K.; Arida, G.; Auge, H.; Brandi, R.; Horgan, F.G.; Hotes, S.; Marquez, L.; Radermacher, N.; Settele, J.; Wolters, V.; Schädler, M. Effects of residue management on decomposition in irrigated rice fields are not related to changes in the decomposer community. *PlosOne.* **2015**, *10*, e0134402, 10.1371/journal.pone.0134402; WOS:000358837700089
148. \*Schneider, M.; Andres, C.; Trujillo, G.; Alcon, F.; Amurrios, P.; Pérez, E.; Weibel, F.; Milz, J. Cocoa and total system yields of organic and conventional agroforestry vs. monoculture systems in a long-term field trial in Bolivia. *Expl. Agric.* **2016**, *53*, 351-374, 10.1017/S0014479716000417; WOS:000402152500003

149. \*Scullion, J.; Neale, S.; Philipps, L. Comparisons of earthworm populations and cast properties in conventional and organic arable rotations. *Soil Use Manage.* **2002**, *18*, 293-300, 10.1079/SUM2002132; WOS:000178455700008
150. \*Sereke, F.; Dobricki, M.; Wilkes, J.; Kaeser, A.; Graves, A.R.; Szerencsits, E.; Herzog, F. Swiss farmers don't adopt agroforestry because they fear for their reputation. *Agrofor. Syst.* **2015**, *90*, 385-394, 10.1007/s10457-015-9861-3; WOS:000381222600002
151. \*Silva, E.M.; Moore, V.M. Cover crops as an agroecological practice on organic vegetable farms in Wisconsin, USA. *Sustainability.* **2017**, *9*, 55, 10.3390/su9010055; WOS:000394842700055
152. \*Skelton, L.E.; Barrett, G.W. A comparison of conventional and alternative agroecosystems using alfalfa (*Medicago sativa*) and winter wheat (*Triticum aestivum*). *Renewable Agric. Food Syst.* **2005**, *20*, 38-47, 10.1079/RAF200478; WOS:000229467200007
153. \*Smith, R.G.; Gross, K.L. Weed community and corn yield variability in diverse management systems. *Weed Sci.* **2006**, *54*, 106-113, 10.1614/WS-05-108R.1; WOS:000234766900014
154. \*Smith, R.G.; Gross, K.L.; Robertson, G.P. Effects of crop diversity on agroecosystem function: crop yield response. *Ecosystems.* **2008**, *11*, 355-366, 10.1007/s10021-008-9124-5; WOS:000255537400001
155. \*Snapp, S.S.; Blackie, M.J.; Gilbert, R.A.; Bezner-Kerr, R.; Kanyama-Phiri, G.Y. Biodiversity can support a greener revolution in Africa. *Proc. Natl. Acad. Sci. U.S.A.* **2012**, *107*, 20840-20845, 10.1073/pnas.1007199107; WOS:000284762400048
156. \*Snapp, S.S.; Gentry, L.E.; Harwood, R. Management intensity - not biodiversity - the driver of ecosystem services in a long-term row crop experiment. *Agr. Ecosyst. Environ.* **2010**, *138*, 242-248, 10.1016/j.agee.2010.05.005; WOS:000281107500014
157. Stainback, G.A.; Masozera, M.; Mukuralinda, A.; Dwivedi, P. Smallholder agroforestry in Rwanda: a SWOT-AHP analysis. *Small Scale For.* **2012**, *11*, 285-300, 10.1007/s11842-011-9184-9; WOS:000307517800001
158. \*Sumarga, E.; Hein, L. Benefits and costs of oil palm expansion in Central Kalimantan, Indonesia, under different policy scenarios. *Reg. Environ. Chang.* **2016**, *16*, 1011-1021, 10.1007/s10113-015-0815-0; WOS:000373310600008
159. \*Syswerda, S.P.; Robertson, G.P. Ecosystem services along a management gradient in Michigan (USA) cropping systems. *Agr. Ecosyst. Environ.* **2014**, *189*, 28-35, 10.1016/j.agee.2014.03.006; WOS:000336821200004
160. \*Tamburini, G.; De Simone, S.; Sigura, M.; Boscutti, F.; Marini, L. Conservation tillage mitigates the negative effect of landscape simplification on biological control. *J. Appl. Ecol.* **2016**, *53*, 233-241, 10.1111/1365-2664.12544; WOS:000368088300026
161. \*Tekken, V.; Spangenberg, J.H.; Burkhard, B.; Escalada, M.; Stoll-Kleemann, S.; Than Truong, D.; Settele, J. "Things are different now": farmer perceptions of cultural ecosystem services of traditional rice landscapes in Vietnam and the Philippines. *Ecosyst. Serv.* **2017**, *25*, 153-166, 10.1016/j.ecoser.2017.04.010; WOS:000418879800016
162. \*Theisen, G.; Silva, J.J.C.; Silva, J.S.; Andres, A.; Anten, N.P.R.; Bastiaans, L. The birth of a new cropping system: towards sustainability in the subtropical lowland agriculture. *Field Crops Res.* **2017**, *212*, 82-94, 10.1016/j.fcr.2017.07.001; WOS:000408784900009
163. \*Todd, J.H.; Malone, L.A.; Bengé, J.; Poulton, J.; Barraclough, E.I.; Wohlers, M.W. Relationships between management practices and ground-active invertebrate biodiversity in New Zealand kiwifruit orchards. *Agr. Forest Entomol.* **2016**, *18*, 11-21, 10.1111/afe.12121; WOS:000367939200002
164. \*Todd, J.H.; Malone, L.A.; McArdle, B.H.; Bengé, J.; Poulton, J.; Thorpe, S.; Beggs, J.R. Invertebrate community richness in New Zealand kiwifruit orchards under organic or integrated pest management. *Agr. Ecosyst. Environ.* **2011**, *141*, 32-38, 10.1016/j.agee.2011.02.007; WOS:000291841700004
165. \*Toledo-Hernández, M.; Denmead, L.H.; Clough, Y.; Raffiudin, R.; Tscharncke, T. Cultural homegarden management practices mediate arthropod communities in Indonesia. *J. Insect Conserv.* **2016**, *20*, 373-382, 10.1007/s10841-016-9871-0; WOS:000379034600003
166. Torquebiau, E.; Dosso, M.; Nakaggwa, F.; Philippon, O. biodiversity conservation through farming: a landscape assessment in KwaZulu-Natal, South Africa. *J. Sustainable Agr.* **2012**, *36*, 296-318, 10.1080/10440046.2011.620227; WOS:000303213700003

167. \*Trichard, A.; Ricci, B.; Ducourtieux, C.; Petit, S. the spatio-temporal distribution of weed seed predation differs between conservation agriculture and conventional tillage. *Agr. Ecosyst. Environ.* **2014**, *188*, 40-47, 10.1016/j.agee.2014.01.031; WOS:000336700100005
168. Turetta, A.P.D.; Tonucci, R.; de Mattos, L.M.; Amaro, G.; Balieiro, F.C.; Prado, R.B.; de Souza, H.A.; Oliveira, A.P. An approach to assess the potential of agroecosystems in providing environmental services. *Pesq. Agropec. Bras.* **2016**, *51*, 1051-1060, 10.1590/S0100-204X2016000900004; WOS:000388061600007
169. \*Van Geel, M.; Verbruggen, E.; De Beenhouwer, M.; van Rennes, G.; Lievens, B.; Honnay, O. High soil phosphorus levels overrule the potential benefits of organic farming on arbuscular mycorrhizal diversity in northern vineyards. *Agr. Ecosyst. Environ.* **2017**, *248*, 144-152, 10.1016/j.agee.2017.07.017; WOS:000411539700016
170. \*Wade, A.S.I.; Asase, A.; Hadley, P.; Mason, J.; Ofori-Frimpong, K.; Preece, D.; Spring, N.; Norris, K. Management strategies for maximizing carbon storage and tree species diversity in cocoa-growing landscapes. *Agr. Ecosyst. Environ.* **2010**, *138*, 324-334, 10.1016/j.agee.2010.06.007; WOS:000281107500024
171. \*Werling, B.P.; Dickson, T.L.; Isaacs, R.; Gaines H.; Gratton, C.; Gross, K.L.; Liere, H.; Malmstrom, C.M.; Meehan, T.D.; Ruan, L.; Robertson, B.A.; Robertson, G.P.; Schmidt, T.M.; Schrottenboer, A.C.; Teal, T.K.; Wilson, J.K.; Landis, D.A. Perennial grasslands enhance biodiversity and multiple ecosystem services in bioenergy landscapes. *Proc. Natl. Sci. USA.* **2014**, *111*, 1652-1657, 10.1073/pnas.1309492111; WOS:000330231100092
172. Wilke, B.J.; Snapp, S.S. Winter cover crops for local ecosystems: linking plant traits and ecosystem function. *J. Sci. Food Agric.* **2008**, *88*, 551-557, 10.1002/jsfa.3149; WOS:000253735900001
173. \*Williams, A.; Hedlund, K. Indicators of soil ecosystem services in conventional and organic arable fields along a gradient of landscape heterogeneity in southern Sweden. *Appl. Soil Ecol.* **2013**, *65*, 1-7, 10.1016/j.apsoil.2012.12.019; WOS:000316584000001
174. \*Winfree, R.; Williams, N.M.; Gaines, H.; Ascher, J.S.; Kremen, C. Wild bee pollinators provide the majority of crop visitation across land-use gradients in New Jersey and Pennsylvania, USA. *J. Appl. Ecol.* **2008**, *45*, 793-802, 10.1111/j.1365-2664.2007.01418.x; WOS:000255464600007
175. \*Winqvist, C.; Bengtsson, J.; Aavik, T.; Berendse, F.; Clement, L.W.; Eggers, S.; Fischer, C.; Flohre, A.; Geiger, F.; Liira, J.; Pärt, T.; Thies, C.; Tschamtkke, T.; Weisser, W.W.; Bommarco, R. Mixed effects of organic farming and landscape complexity on farmland biodiversity and biological control potential across Europe. *J. Appl. Ecol.* **2011**, *48*, 570-579, 10.1111/j.1365-2664.2010.01950.x; WOS:000290587100009
176. \*Winqvist, C.; Bengtsson, J.; Öckinger, E.; Aavik, T.; Berendse, F.; Clement, L.W.; Fischer, C.; Flohre, A.; Geiger, F.; Liira, J.; Thies, C.; Tschamtkke, T.; Weisser, W.W.; Bommarco, R. Species' traits influence ground beetle responses to farm and landscape level agricultural intensification in Europe. *J. Insect. Conserv.* **2014**, *18*, 837-846, 10.1007/s10841-014-9690-0; WOS:000343726300008
177. \*Xue, J.F.; Liu, S.L.; Chen, Z.D.; Chen, F.; Lal, R.; Tang, H.M.; Zhang H.L. Assessment of carbon sustainability under different tillage systems in a double rice cropping system in Southern China. *Int. J. Cycle Assess.* **2014**, *19*, 1581-1592, 10.1007/s11367-014-0768-4; WOS:000340621500002
178. \*Zhang, D.; Min, Q.; Liu, M.; Cheng, S. Ecosystem service tradeoff between traditional and modern agriculture: a case study in Congjiang Country, Guizhou Province, China. *Fron. Environ. Sci. Eng.* **2012**, *6*, 743-752, 10.1007/s11783-011-0385-4; WOS:000310324900017
179. Zimmerer, K.S. Conserving agrobiodiversity amid global change, migration, and nontraditional livelihood networks: the dynamic uses of cultural landscape knowledge. *Ecol. Soc.* **2014**, *19*, 1, 10.5751/ES-06316-190201; WOS:000338711600018
