# Supplementary material
Source: MDPI journal article supplement (https://www.mdpi.com/2071-1050/10/12/4339)
Supplement: s1 [file s1]

## Supplementary material 1

**Table S 1.** Complete list of attributes compiled in our literature review. Attributes column refers to the type of data introduced in each variable. Description column describes some of the variables or attributes meaning.

| Variables                          | Attributes                                     | Description                                                                                                                      |
|------------------------------------|------------------------------------------------|----------------------------------------------------------------------------------------------------------------------------------|
| <b>Publication characteristics</b> |                                                |                                                                                                                                  |
| Title of the paper                 | -                                              | -                                                                                                                                |
| Authors                            | -                                              | -                                                                                                                                |
| Number of authors                  | -                                              | -                                                                                                                                |
| First author discipline            | -                                              | -                                                                                                                                |
| Interdisciplinary team             | 1, 0                                           | -                                                                                                                                |
| Year of publication                | -                                              | -                                                                                                                                |
| Journal                            | -                                              | -                                                                                                                                |
| Web of science research areas      | -                                              | -                                                                                                                                |
| <b>Study characteristics</b>       |                                                |                                                                                                                                  |
| Type of study                      | Theoretical, analytical                        | -                                                                                                                                |
| Type of data                       | Primary, secondary                             | Studies using data directly compiled by the author(s) (primary), or studies using data previously compiled by others (secondary) |
| Country first author               | -                                              | -                                                                                                                                |
| Country(ies) research              | -                                              | -                                                                                                                                |
| Limits                             | Administrative, biophysical                    | Studies developed within administrative or biophysical limits                                                                    |
| Study area                         | -                                              | -                                                                                                                                |
| Rural/Urban                        | Rural, urban                                   | Studies developed in rural or urban areas                                                                                        |
| Spatial scale                      | Local, regional, subnational, national, global | -                                                                                                                                |
| Crop type                          | -                                              | -                                                                                                                                |
| Period studied                     | Punctual, monitoring                           | Studies developed in a specific moment (punctual) or through several years (monitoring)                                          |
| Institutional context specified    | Yes, No                                        | If papers specified the institutional context                                                                                    |

|                                                                                                                                                                                                                                                                                                                                                                                                                                                                                                                                               |                                    |                                                                                                                             |
|-----------------------------------------------------------------------------------------------------------------------------------------------------------------------------------------------------------------------------------------------------------------------------------------------------------------------------------------------------------------------------------------------------------------------------------------------------------------------------------------------------------------------------------------------|------------------------------------|-----------------------------------------------------------------------------------------------------------------------------|
| Institutional context                                                                                                                                                                                                                                                                                                                                                                                                                                                                                                                         | -                                  | Description of the institutional context (only if specified)                                                                |
| Participation                                                                                                                                                                                                                                                                                                                                                                                                                                                                                                                                 | Yes, No                            | If the study used any participative technique or not                                                                        |
| Other benefits                                                                                                                                                                                                                                                                                                                                                                                                                                                                                                                                | Social, Economic, Human well-being | If other benefits emerged from the application of agroecological practices                                                  |
| Methodology                                                                                                                                                                                                                                                                                                                                                                                                                                                                                                                                   | Biophysical, Economic, Social      | -                                                                                                                           |
| Quantitative/Qualitative                                                                                                                                                                                                                                                                                                                                                                                                                                                                                                                      | Quantitative, Qualitative          | -                                                                                                                           |
| Compared to                                                                                                                                                                                                                                                                                                                                                                                                                                                                                                                                   | -                                  | Description of the type of agricultural management which the sustainable agricultural system is compared to (if applicable) |
| Transition                                                                                                                                                                                                                                                                                                                                                                                                                                                                                                                                    | Yes, No                            | If there is an agroecological transition in the study                                                                       |
| Transition aim                                                                                                                                                                                                                                                                                                                                                                                                                                                                                                                                | -                                  | -                                                                                                                           |
| <b>FAO's agroecology elements</b>                                                                                                                                                                                                                                                                                                                                                                                                                                                                                                             |                                    |                                                                                                                             |
| Efficiency, Balance, Diversity, Co-creation of knowledge, Recycling, Synergies, Human and social value, Circular economy, Culture and food traditions, Land and natural resources governance                                                                                                                                                                                                                                                                                                                                                  | 1,0                                | If studies which considered any FAO's agroecology elements (1) or not (0)                                                   |
| <b>Agricultural system management keywords</b>                                                                                                                                                                                                                                                                                                                                                                                                                                                                                                |                                    |                                                                                                                             |
| Agroecolog*; Integrated farm*/agricult*/product*; Diversified farm*/agricult*/product*; Organic farm*/agricult*/product*; Conservation farm*/agricult*/product*; Alternative farm*/agricult*/product*; Ecologically intensive farm*/agricult*/product*; Ecofarm* Ecoagricult*; Permaculture; Natural farm*/agricult*/product*; Biodiversity-based farm*/agricult*/product*; Sustainable farm*/agricult*/product*; Eco-functional intensification; Multifunctional farm*/agricult*; Environment* sensitive farm*/agricult*/product*; Low-input | 1, 0                               | If studies which mentioned any agricultural system management keyword (1) or not (0)                                        |

|                                                                                                                                                                                                                                                                                                                                                                                                                                                                                                                                                                                                                                                                                                                                                                                                                                                                        |      |                                                                                  |
|------------------------------------------------------------------------------------------------------------------------------------------------------------------------------------------------------------------------------------------------------------------------------------------------------------------------------------------------------------------------------------------------------------------------------------------------------------------------------------------------------------------------------------------------------------------------------------------------------------------------------------------------------------------------------------------------------------------------------------------------------------------------------------------------------------------------------------------------------------------------|------|----------------------------------------------------------------------------------|
| farm*/agricult*/product*; Farm*/agricult* transition;<br>Social farm*/agricult*; Biodynamic or bio-dynamic<br>farm*/agricult*                                                                                                                                                                                                                                                                                                                                                                                                                                                                                                                                                                                                                                                                                                                                          |      |                                                                                  |
| <b>Ecosystem services context keywords</b>                                                                                                                                                                                                                                                                                                                                                                                                                                                                                                                                                                                                                                                                                                                                                                                                                             |      |                                                                                  |
| Ecosystem* service*; Ecosystem* good*; Ecosystem* function*; Environmental service*; Environmental good*; Natur* service*; Provisioning service*; Regulating service*; Cultural service*; Farm* service*; Agricult* service*; Agroecosystem service*/function*/good*                                                                                                                                                                                                                                                                                                                                                                                                                                                                                                                                                                                                   | 1, 0 | If studies which mentioned any ecosystem services context keyword (1) or not (0) |
| <b>Ecosystem services keywords</b>                                                                                                                                                                                                                                                                                                                                                                                                                                                                                                                                                                                                                                                                                                                                                                                                                                     |      |                                                                                  |
| Biomass based energy; Fodder; Fiber; Raw material; Food; Genetic material*; Medicinal resource*; Ornamental resource*; Timber; Habitat; Pest, weed and disease control; Waste treatment; Carbon; Air flow regulation; Erosion protection; Soil formation; Soil fertility; Maintenance of soil structure; Nutrient* cycling; Climate regulation; Water flow maintenance/regulation; Pollination; Seed dispers*; Inspiration; Relax/Tranquility; Cultural value*/Heritage; Traditional ecological knowledge; Environment* educat*; Scientific knowledge; Sense of place; Recreat*; Touris*; Aesthetic value                                                                                                                                                                                                                                                              | 1, 0 | If studies which analyzed any ecosystem service (1) or not (0)                   |
| <b>Agricultural practices keywords</b>                                                                                                                                                                                                                                                                                                                                                                                                                                                                                                                                                                                                                                                                                                                                                                                                                                 |      |                                                                                  |
| Cover crops; Perennial crops; Natural/no pesticides; Natural/no fertilizers; Natural/no herbicide; Combined food and energy production system; Trees belts/living fences/ buffer treatments; Shade tree canopy; Combination of annual crops and perennials; Surrounding landscape; Crop-rotations; No/light tillage/plowing; Sustainable policies; Sustainable crop residue management; Crop associations; Social inclusion; Farmers' associations; Food waste for feeding pigs; Inclusion of animal component; No fire use; Permanent litter on soil surface; Ditches or holes to trap organic litter; Green infrastructures; Infrastructures to store water; Installation of renewable energies; Field margin width; Legumes; Training and extension services; Improved grassland; Implementation of small-scale agro-industry; Agro-forestry; Crop diversification; | 1, 0 | If studies which analyzed any agricultural practice (1) or not (0)               |

|                                                                                                                                                                                                                                                                                                    |                    |                                                                              |
|----------------------------------------------------------------------------------------------------------------------------------------------------------------------------------------------------------------------------------------------------------------------------------------------------|--------------------|------------------------------------------------------------------------------|
| Enhancement of irrigation management; Fallow; Access to markets; Extensive livestock; Good animal management; Managed honeybees; Managed timing of flowering; Creating nesting sites for pollinators; Minimal pruning; Vermiculture; Local varieties; Nest boxes for birds; Intercrop; Homegardens |                    |                                                                              |
| <b>Data from empirical studies (only for second database)</b>                                                                                                                                                                                                                                      |                    |                                                                              |
| Practice analyzed                                                                                                                                                                                                                                                                                  | -                  | -                                                                            |
| Ecosystem service analyzed                                                                                                                                                                                                                                                                         | -                  | -                                                                            |
| Sustainable agricultural system analyzed                                                                                                                                                                                                                                                           | -                  | -                                                                            |
| Compared to                                                                                                                                                                                                                                                                                        | -                  | Agricultural system which the sustainable agricultural system is compared to |
| Data                                                                                                                                                                                                                                                                                               | -                  | Ecosystem services' indicator                                                |
| Value of sustainable agricultural system                                                                                                                                                                                                                                                           | -                  | Numerical value                                                              |
| Value of compared system                                                                                                                                                                                                                                                                           | -                  | Numerical value                                                              |
| Units                                                                                                                                                                                                                                                                                              | -                  | -                                                                            |
| Type of relation                                                                                                                                                                                                                                                                                   | Positive, Negative | -                                                                            |
